# Supplementary material
Source: PubMed Central journal article supplement (PMC11375468)
Supplement: NIHMS2018026-supplement-Jiang-4424254-materials.pdf [file NIHMS2018026-supplement-Jiang-4424254-materials.pdf]

Materials List for

# Determination of Mitochondrial Respiration and Glycolysis in *Ex Vivo* Retinal Tissue Samples

Ke Jiang<sup>1</sup>, Jacob Nelliserry<sup>1</sup>, Anand Swaroop<sup>1</sup>

<sup>1</sup>Neurobiology, Neurodegeneration & Repair Laboratory, National Eye Institute, National Institutes of Health

## Corresponding Authors

**Ke Jiang**  
coco.jiang@nih.gov

**Anand Swaroop**  
swaroopa@nei.nih.gov

## Citation

Jiang, K., Nelliserry, J., Swaroop, A. Determination of Mitochondrial Respiration and Glycolysis in *Ex Vivo* Retinal Tissue Samples. *J. Vis. Exp.* (174), e62914, doi:10.3791/62914 (2021).

## Date Published

August 4, 2021

## DOI

10.3791/62914

## URL

jove.com/video/62914

## Materials

| Name                                          | Company               | Catalog Number | Comments                                                   |
|-----------------------------------------------|-----------------------|----------------|------------------------------------------------------------|
| 1X PBS                                        | Thermo Fisher         | 14190-144      |                                                            |
| 2-Deoxy glucose (2-DG), 500 mM stock solution | Sigma                 | D6134          | Dissolve in Seahorse XF DMEM medium, prepare ahead of time |
| 30-gauge needle                               | BD Precision Glide    | 305106         |                                                            |
| Antimycin A, 10 mM stock solution             | Sigma                 | A8674          | Dissolve in DMSO, prepare ahead of time                    |
| Bam15, 10 mM stock solution                   | TimTec                | ST056388       | Dissolve in DMSO, prepare ahead of time                    |
| Biopsy puncher, 1 mm                          | Integra Miltex        | 33-31AA        |                                                            |
| Cell-Tak                                      | Corning Life Sciences | CB40240        |                                                            |
| CO2 asphyxiation chamber                      |                       |                |                                                            |
| Dissection forceps-Dumont #5                  | Fine Science Tools    | 11251-10       | Stright tip                                                |
| Dissection forceps-Dumont #7                  | Fine Science Tools    | 11274-20       | Curved tip                                                 |
| Dissection microscope                         |                       |                |                                                            |
| DMSO                                          | Sigma                 | D2438          |                                                            |
| Graefe forceps                                | Fine Science Tools    | 11051-10       | Curved, Serrated tip                                       |
| Microscissors                                 | Fine Science Tools    | 15004-08       | Curved tip                                                 |
| NaOH solution, 1 M                            | Sigma-Aldrich         | S8263          | Aqueous solution, prepare ahead of time                    |
| Rotenone, 10 mM stock solution                | Sigma                 | R8875          | Dissolve in DMSO, prepare ahead of time                    |
| Seahorse calibration medium                   | Agilent               | 100840-000     |                                                            |
| Seahorse XF 1.0 M glucose                     | Agilent               | 103577-100     |                                                            |
| Seahorse XF 100 mM pyruvate                   | Agilent               | 103578-100     |                                                            |
| Seahorse XF 200 mM glutamine                  | Agilent               | 103579-100     |                                                            |
| Seahorse XF DMEM medium                       | Agilent               | 103575-100     | pH 7.4, with 5 mM HEPES                                    |
| Seahorse XFe24 Islet Capture FluxPak          | Agilent               | 103518-100     | Containing Sensor Cartridge and Islet Capture microplate   |
| Seahorse XFe24, Extra Cellular Flux Analyzer  | Agilent               |                |                                                            |

|                                    |               |       |                                         |
|------------------------------------|---------------|-------|-----------------------------------------|
| Sodium bicarbonate solution, 0.1 M | Sigma-Aldrich | S5761 | Aqueous solution, prepare ahead of time |
| Superfine eyelash brush            | Ted Pella     | 113   |                                         |
